# Supplementary material for: Genomic Insights into Seed Germination Differences in Buffalobur (Solanum rostratum Dunal) under Contrasting GA and ABA Availability
Source: MDPI journal article supplement (doi:10.3390/agronomy14010212), 2024-01-18
Supplement: s1 [file s1]

Table S1. Primers for expression analysis of 20 DEGs in buffalobur seeds

| Gene ID    | Forward primer                 | Reverse primer                |
|------------|--------------------------------|-------------------------------|
| c76033_g1  | GCGGAAAAATATGGTGCAAAACGGG      | GCAGAAGACGGCAAAACGGG          |
| c134052_g1 | TGAAGAGGGAGCCAAGTGTCCA         | CGATAAAGGAACCAGCCAACAAGCAC    |
| c135078_g1 | CGATAAGCCTAGCAATAACCCACT       | CGAATCCACCCTCTGTCAACG         |
| c193708_g2 | ATATGGAGAAGGAGGGAAAAGGTATGC    | GGGCTTGTTTGGAGAGAGTGGT        |
| c219127_g1 | GCACAAGGAAAAGTAATGAACTGAAAACCC | ACCCAAATTAACCGAAAACCCAATGC    |
| c224642_g1 | CGCCAAGATGAAAAAGACAACTGAACG    | ACCCAAGGAGGCAGAACAATCG        |
| c211446_g1 | CGTATTCACCTTCTGTCTGTCC         | GTATGGGTATGGGTATGGGTTCTGGT    |
| c177902_g1 | CGAAGAATAACGGAAGTGAAGAAGC      | GAATACGGTTGTTGGAGTGATCTTGGA   |
| c110023_g1 | AGGTTCTTGATGACTCCACCAACG       | AGCCATTCCTGTTGTTTCTTGTTTCGT   |
| c228847_g2 | CGCCATAGCCAGTAACACCTTCA        | AGAATTGCCAGAATCCACACG         |
| c215512_g1 | TAACTCAAATCCCTGGCTTCAATGGC     | TACAACTGGGTCCTCTGATGGG        |
| c227571_g1 | CGTTCAGCCCCAAGTTCTATTCT        | TTCCACAGACCCCAACCAT           |
| c155529_g1 | CCCTCACAAACCCCCAAAAAAGAT       | GGTAGGAGTGACAAGTGCTGGAT       |
| c233052_g1 | ATGGATGGGTTCAAGAGATGGC         | GCATTGAGTCGCCGTAAAATCCT       |
| c197117_g2 | TCCAATACTACAAAACCCCAATG        | CATCACACAAGGACAACCCAATATG     |
| c194246_g2 | AGTCCCTCTGTTTCTGATATAATTCTGC   | TTCCCTTGCTCTCTTCCACTTCTCTAT   |
| c227970_g1 | AAGCGGGACAAGTGAACAAGACTA       | CCTCCTTCTCCTTCTTTTCGTGCTC     |
| c178034_g1 | GGTGTCTTCCCCAGTATTCCTT         | ACAAGCACAGAGCGATTAGAGATT      |
| c233593_g3 | TCCAACAACACTTCGGGGCTC          | GCTTCACACTCTTAAACCTCCCATTAGTC |
| c208761_g1 | AAGGGTTTGTTAGAGTCAATGGTGC      | ACATAAAGAGAGCCCCGCAG          |

Table S2. Primers of reference gene and genes related to seed dormancy and germination in buffalobur seeds

| Gene           | Gene ID    | Forward primer               | Reverse primer                |
|----------------|------------|------------------------------|-------------------------------|
| <i>PP2Acs</i>  | c211752_g1 | GCCAGTAAAAAGCCCTGTGACTA      | CGCAAGCATTTCATCATAGAACCCAT    |
| <i>GAI</i>     | c155529_g1 | CCCTCACAAACCCCCAAAAAAGAT     | GGTAGGAGTGACAAGTGCTGGAT       |
| <i>GA3ox1</i>  | c228847_g2 | CGCCATAGCCAGTAACACCTTCA      | AGAATTGCCAGAATCCCACGC         |
| <i>GA2ox2</i>  | c233593_g3 | TCCAACAACACTTCGGGGCTC        | GCTTCACACTCTTAAACCTCCCATTAGTC |
| <i>PYL2</i>    | c178034_g1 | GGTGTCTTCCCCAGTATTCCCTT      | ACAAGCACAGAGCGATTAGAGATT      |
| <i>NCED6</i>   | c227970_g1 | AAGCGGGACAAGTGAACAAGACTA     | CCTCCTTCTCCTTCTTTCGTGCTC      |
| <i>CYP707A</i> | c197117_g2 | TCCAACATACTCACAAAACCCCAATG   | CATCACACAAGGACAACCCAATATG     |
| <i>MAN2</i>    | c208761_g1 | AAGGGTTTGTTAGAGTCAATGGTGC    | ACATAAAGAGAGCCCCGCAG          |
| <i>MAN5</i>    | c233052_g1 | ATGGATGGGTTCAAGAGATGGC       | GCATTGAGTCGCCGTAAAATCCT       |
| <i>MAN7</i>    | c194246_g2 | AGTCCCTCTGTTTCTGATATAATTCTGC | TTCCCTTGCTCTCTTCCACTTCTCTAT   |
